# Supplementary figures and images for: Nanocrystalline iron hydroxide lignocellulose filters for arsenate remediation
Source: Royal Society of Chemistry journal article supplement (doi:10.1039/d3su00326d), 2024-01-01

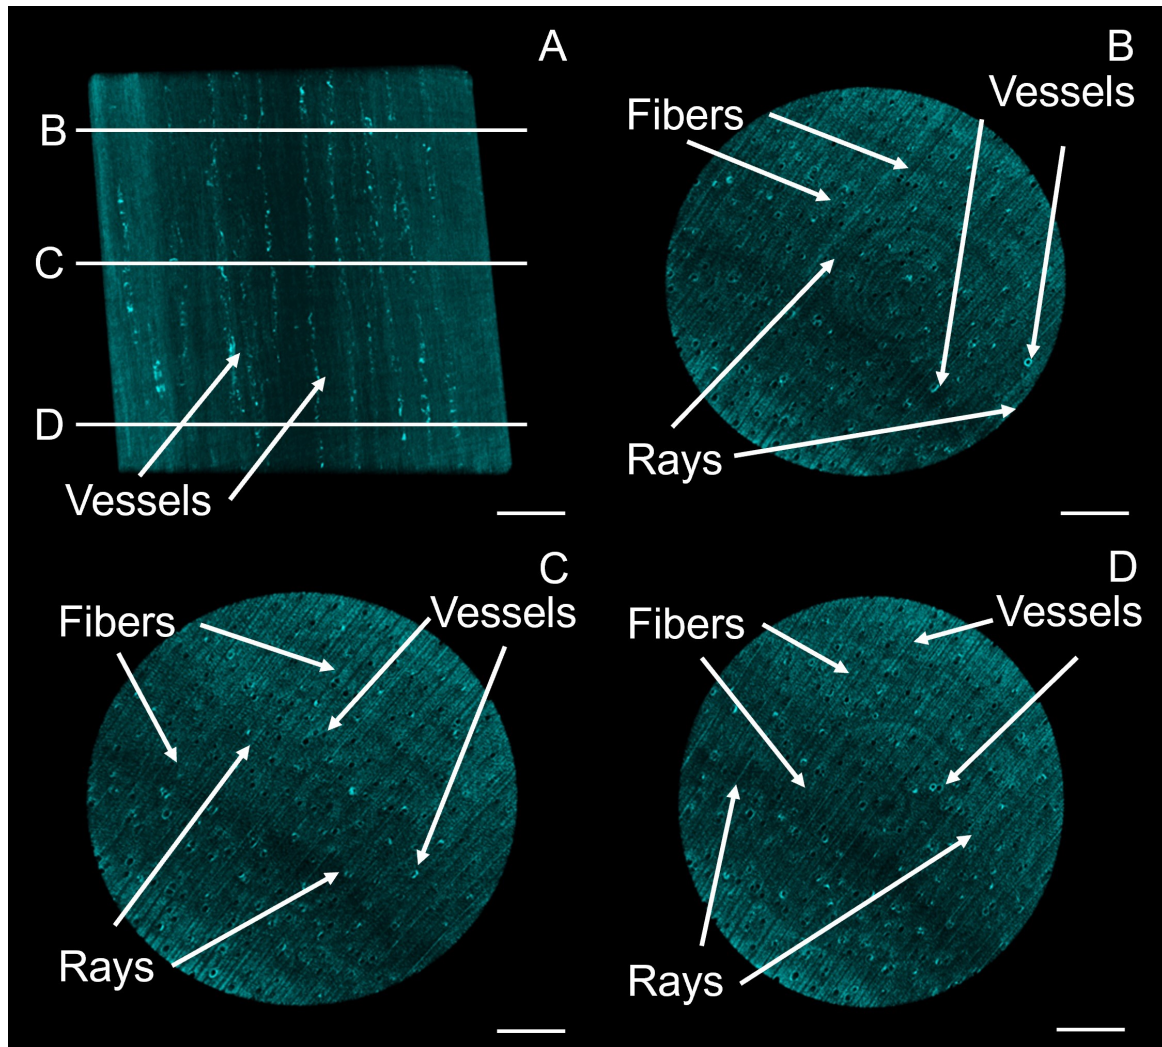

Supplement: d3su00326d2.pdf [file d3su00326d2.pdf]

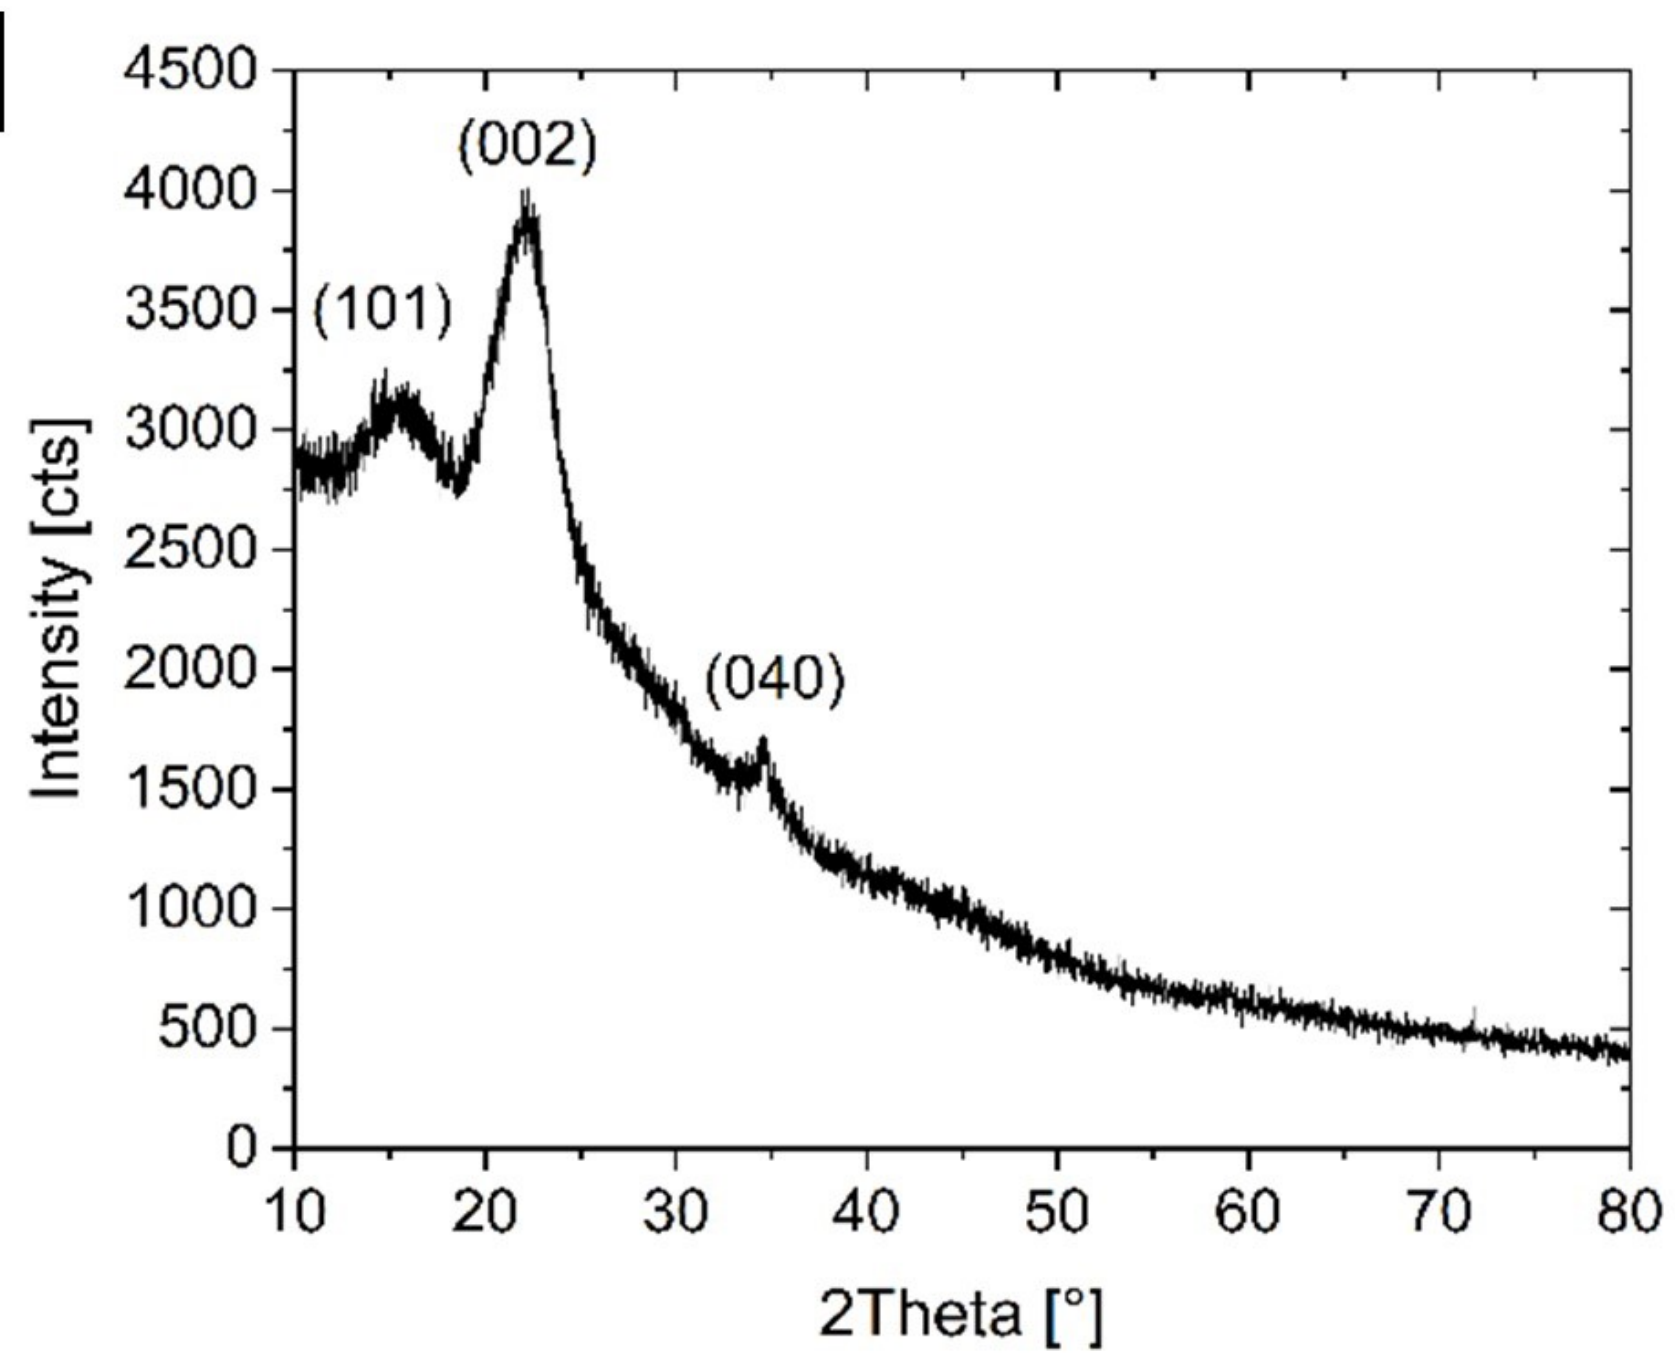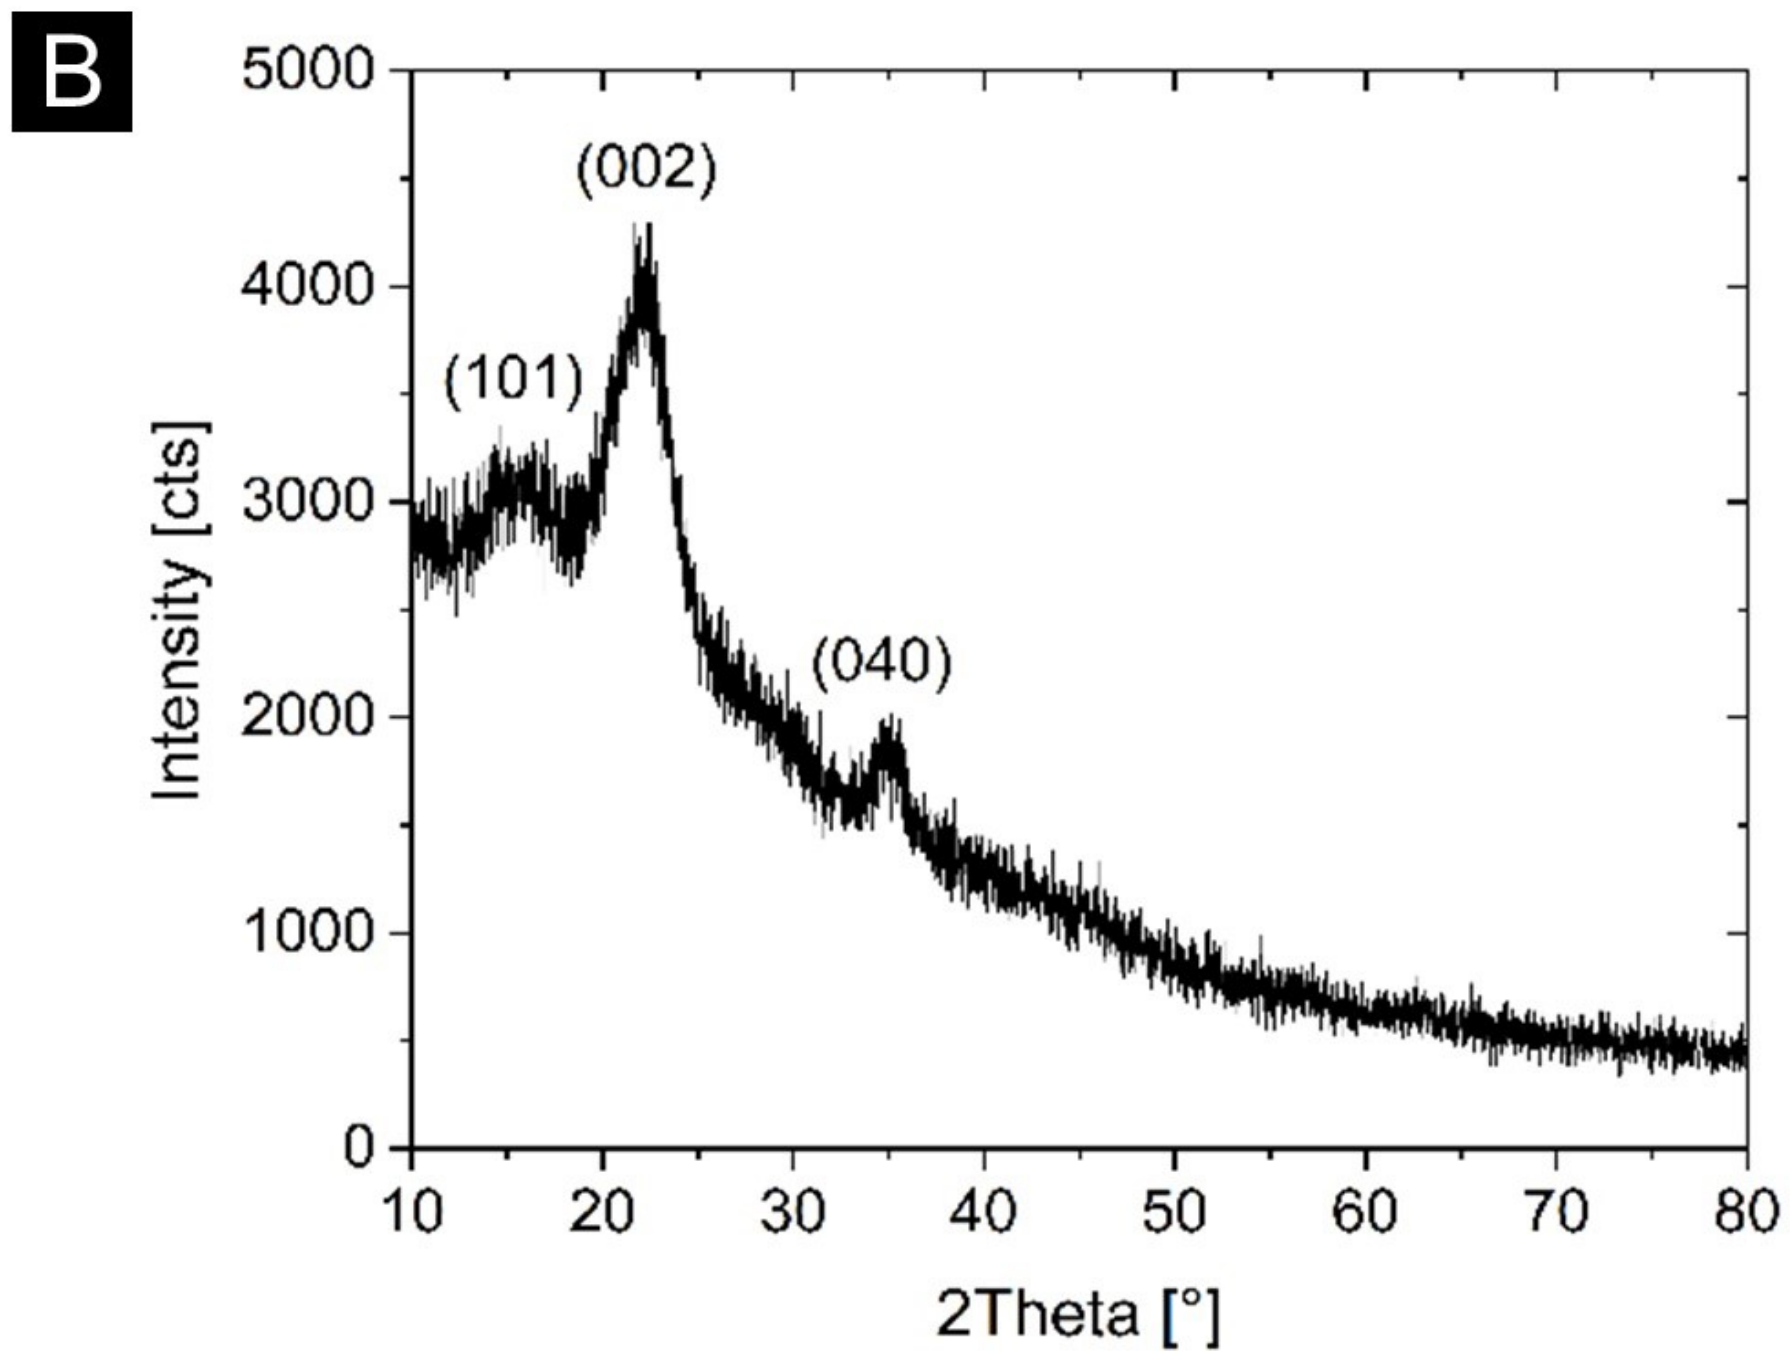

Supplement: d3su00326d3.pdf [file d3su00326d3.pdf]

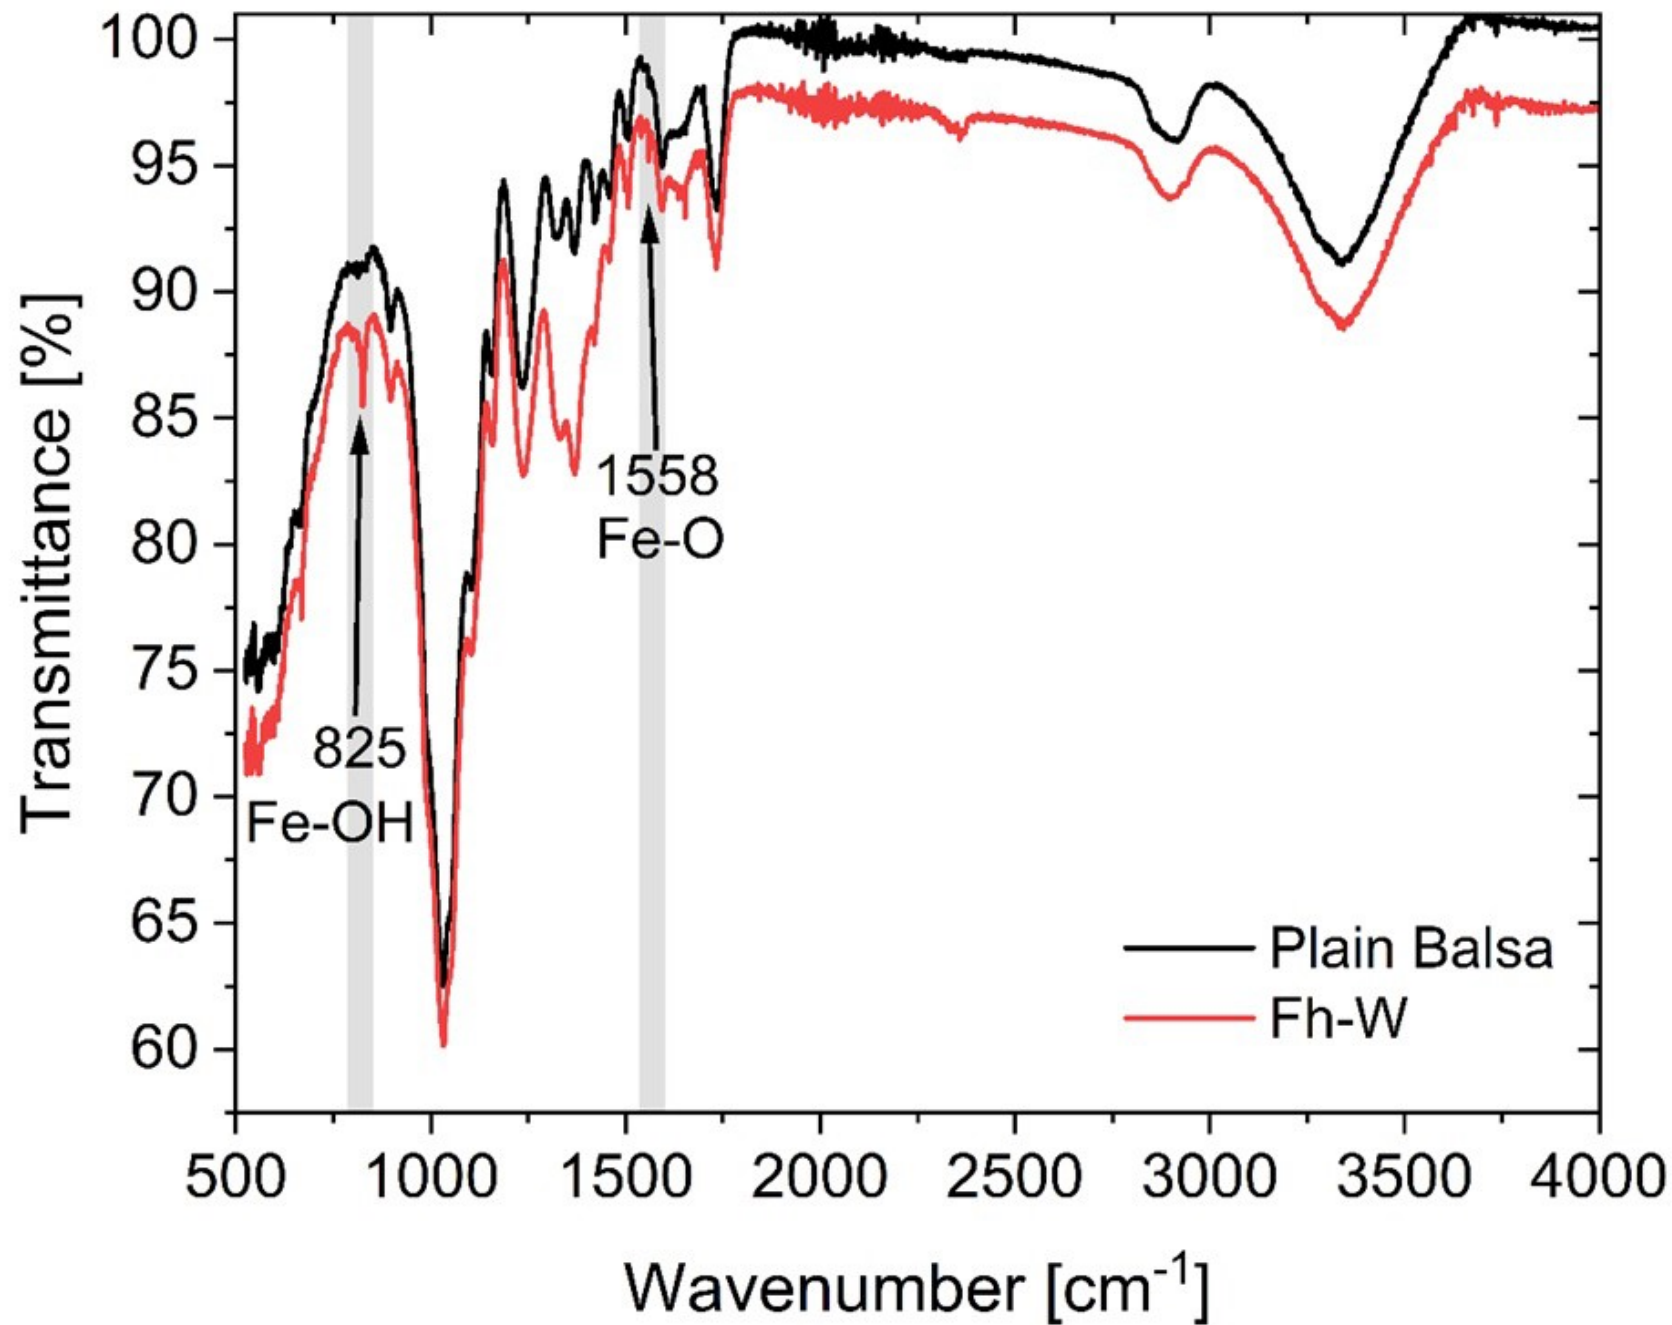

Supplement: d3su00326d4.pdf [file d3su00326d4.pdf]

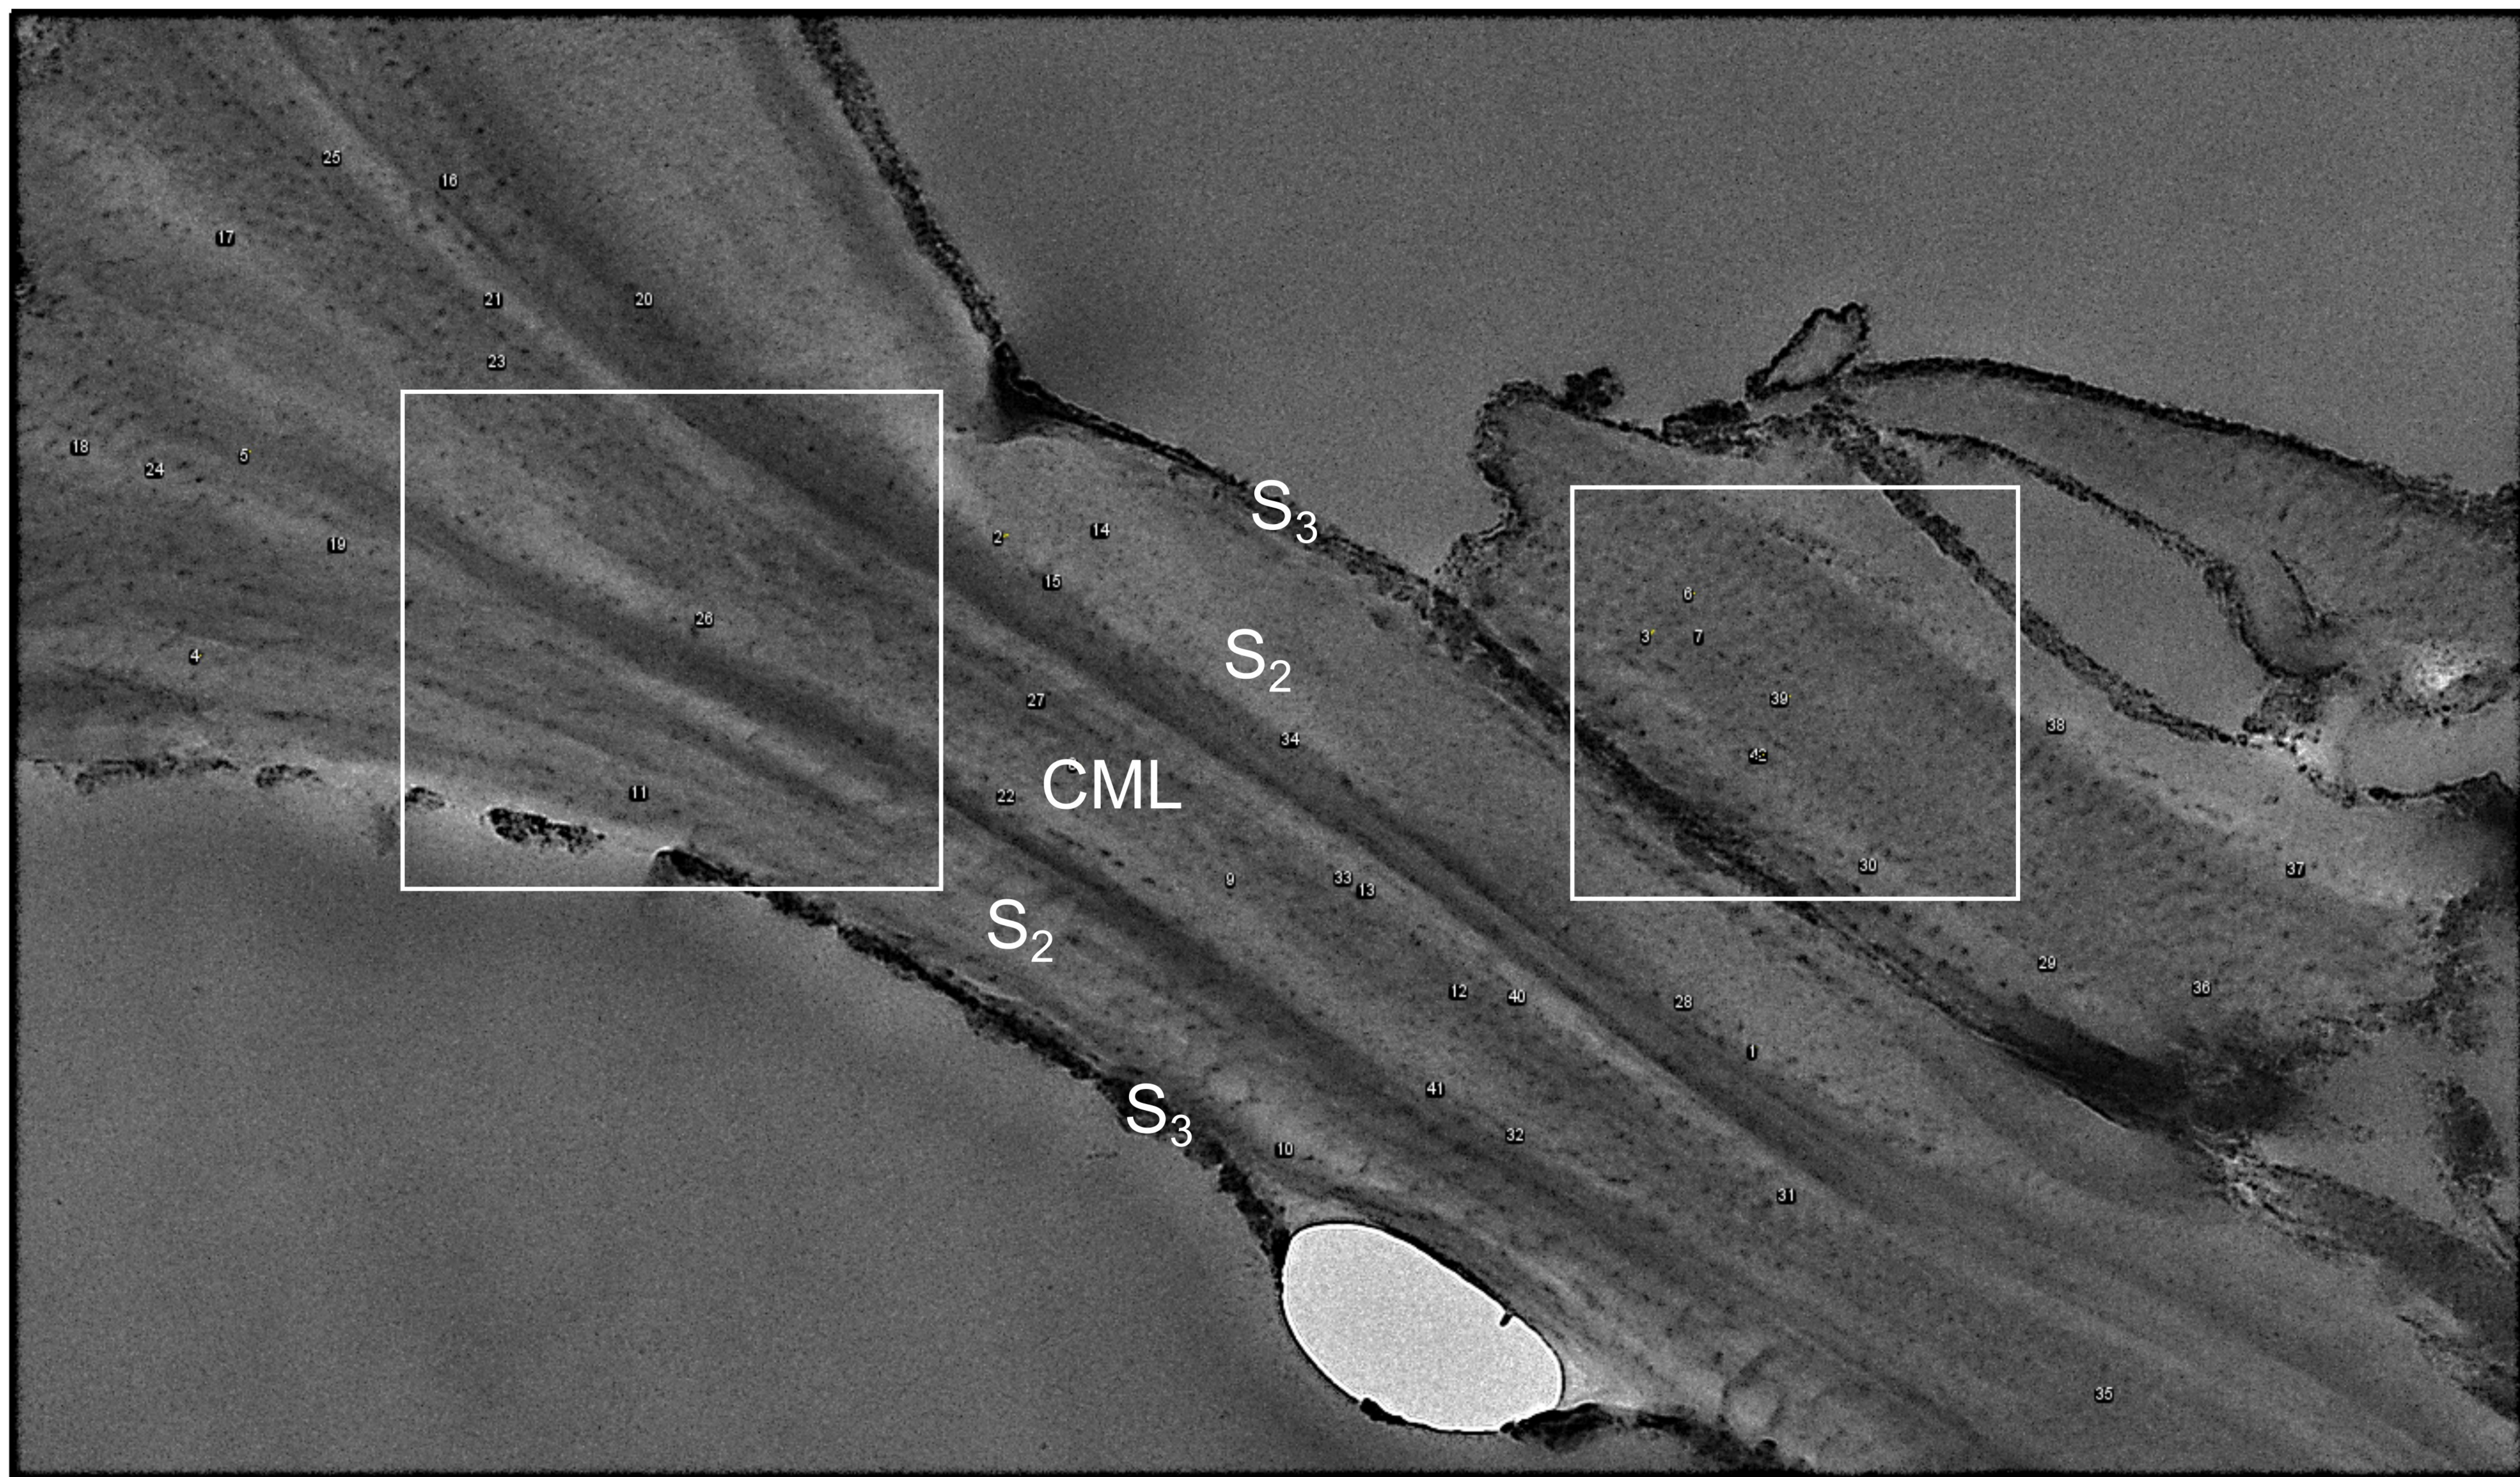

1  $\mu$ m

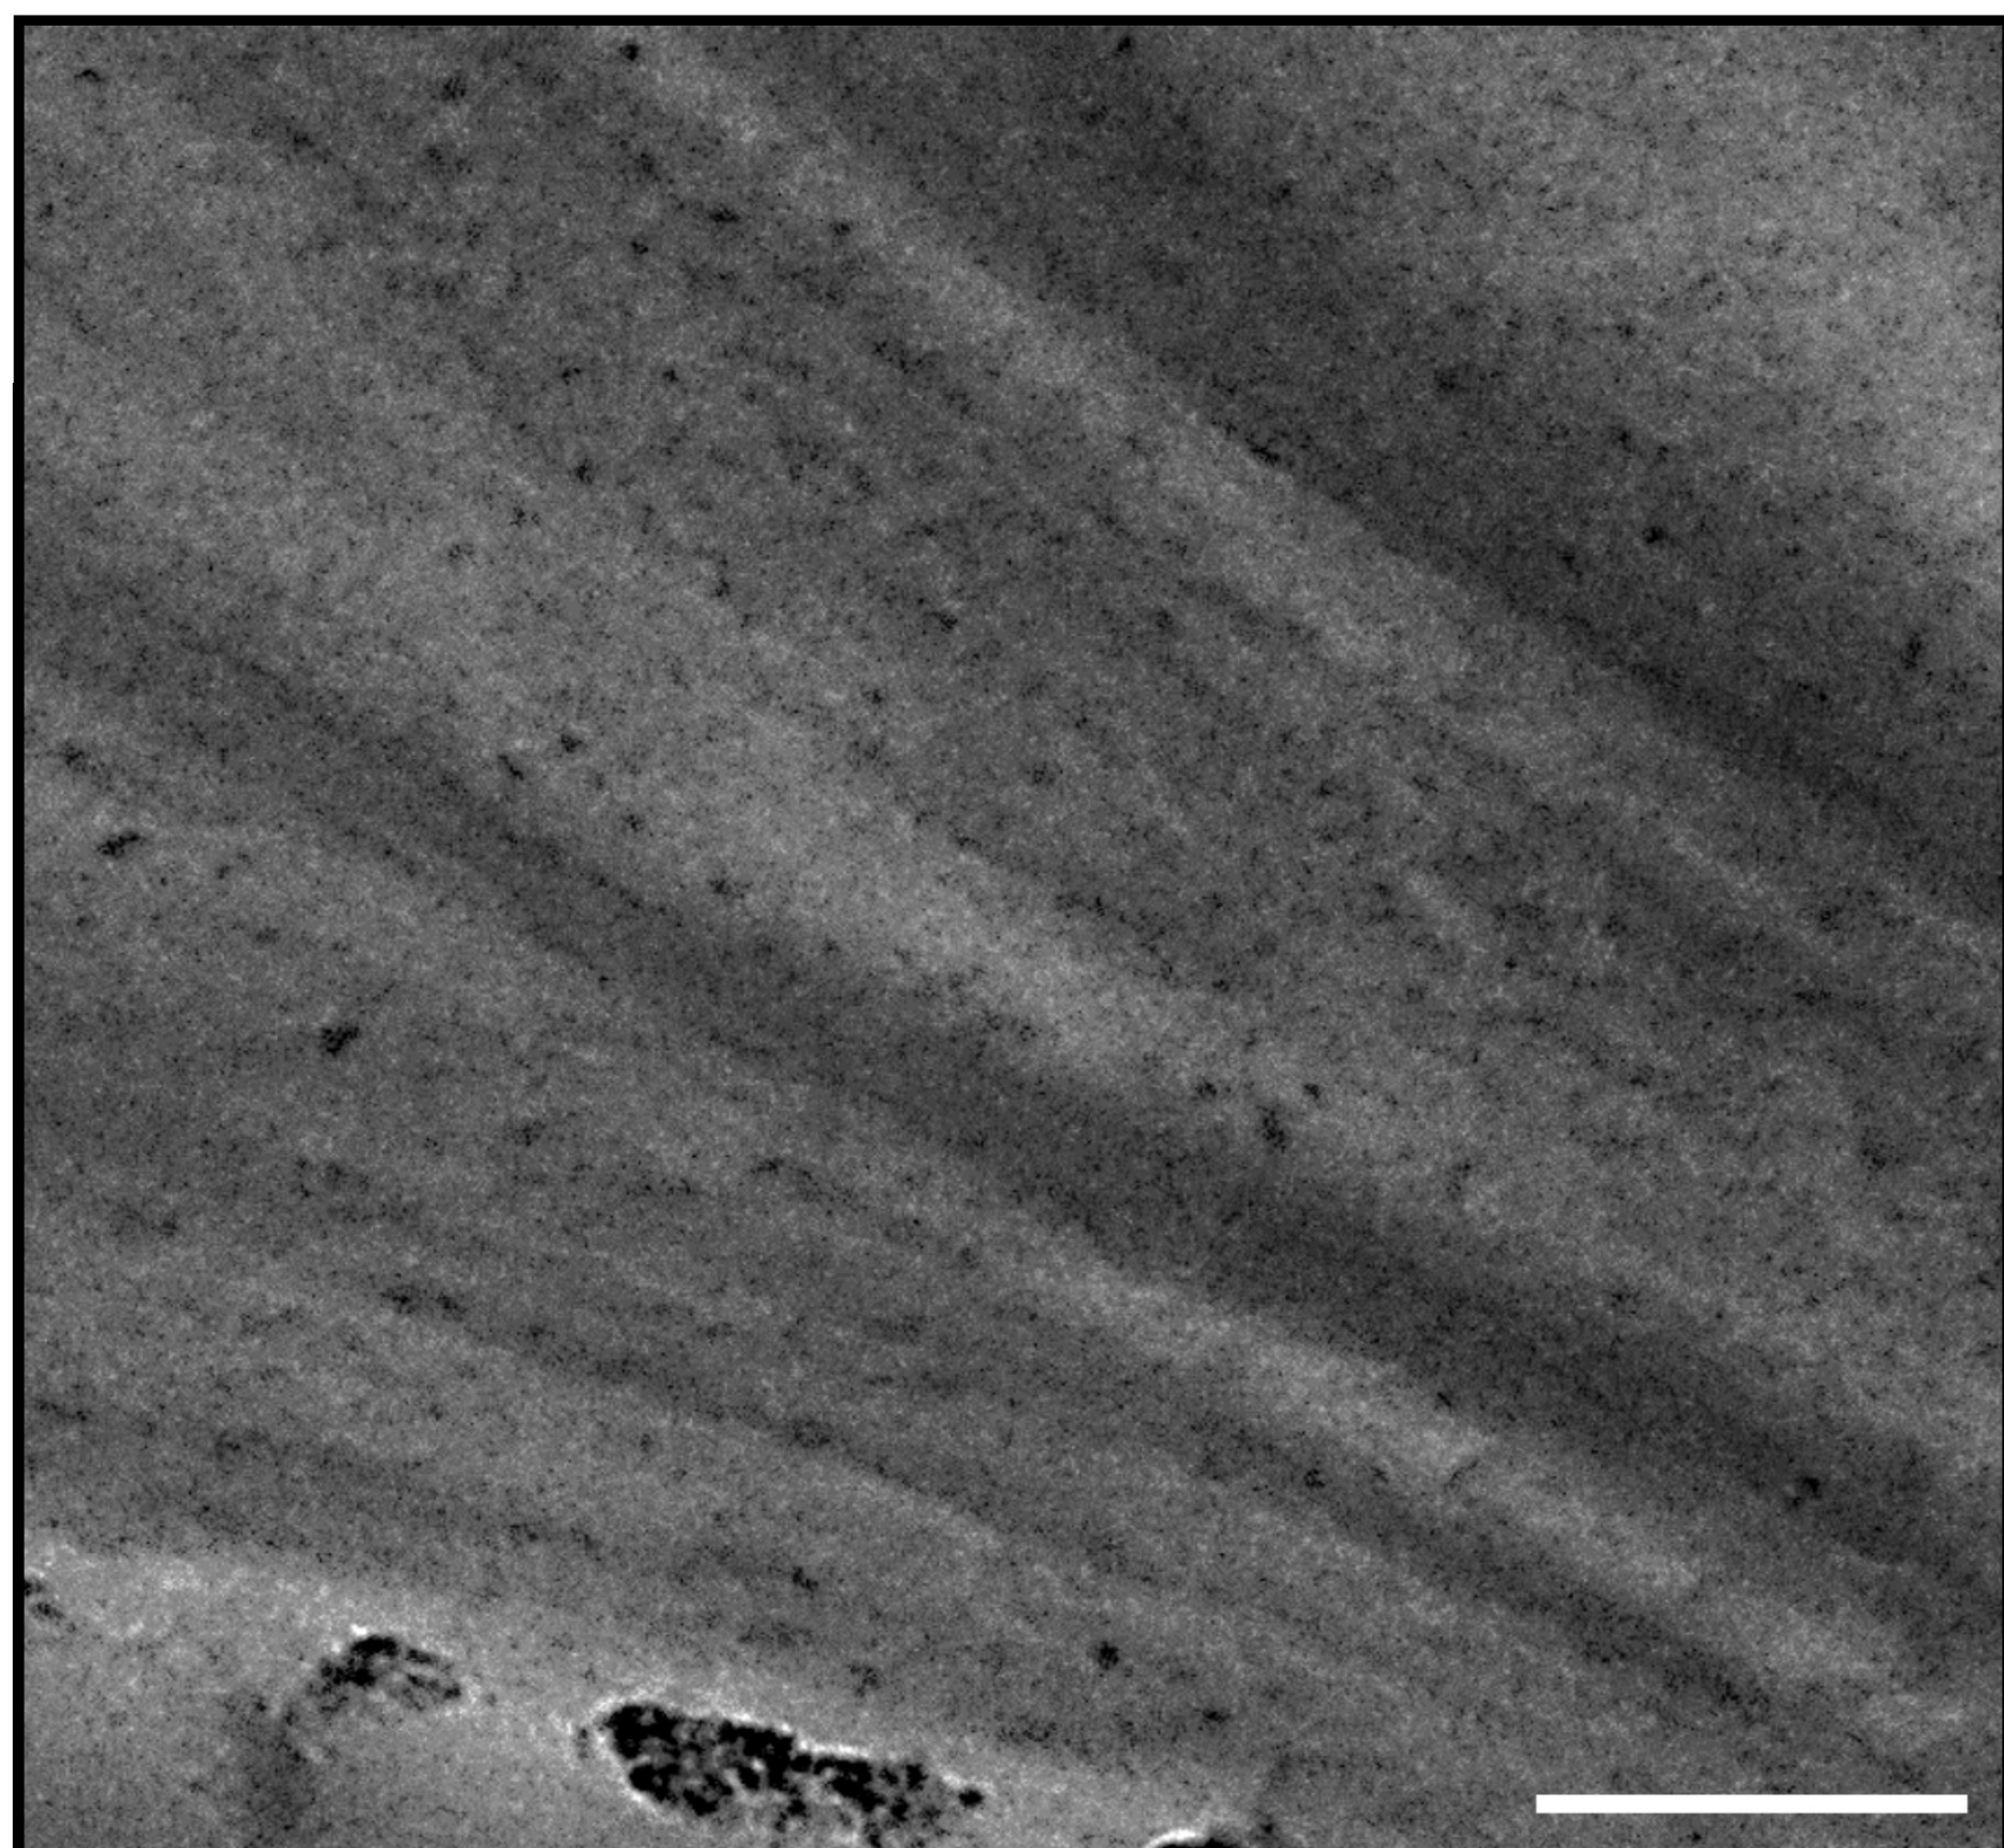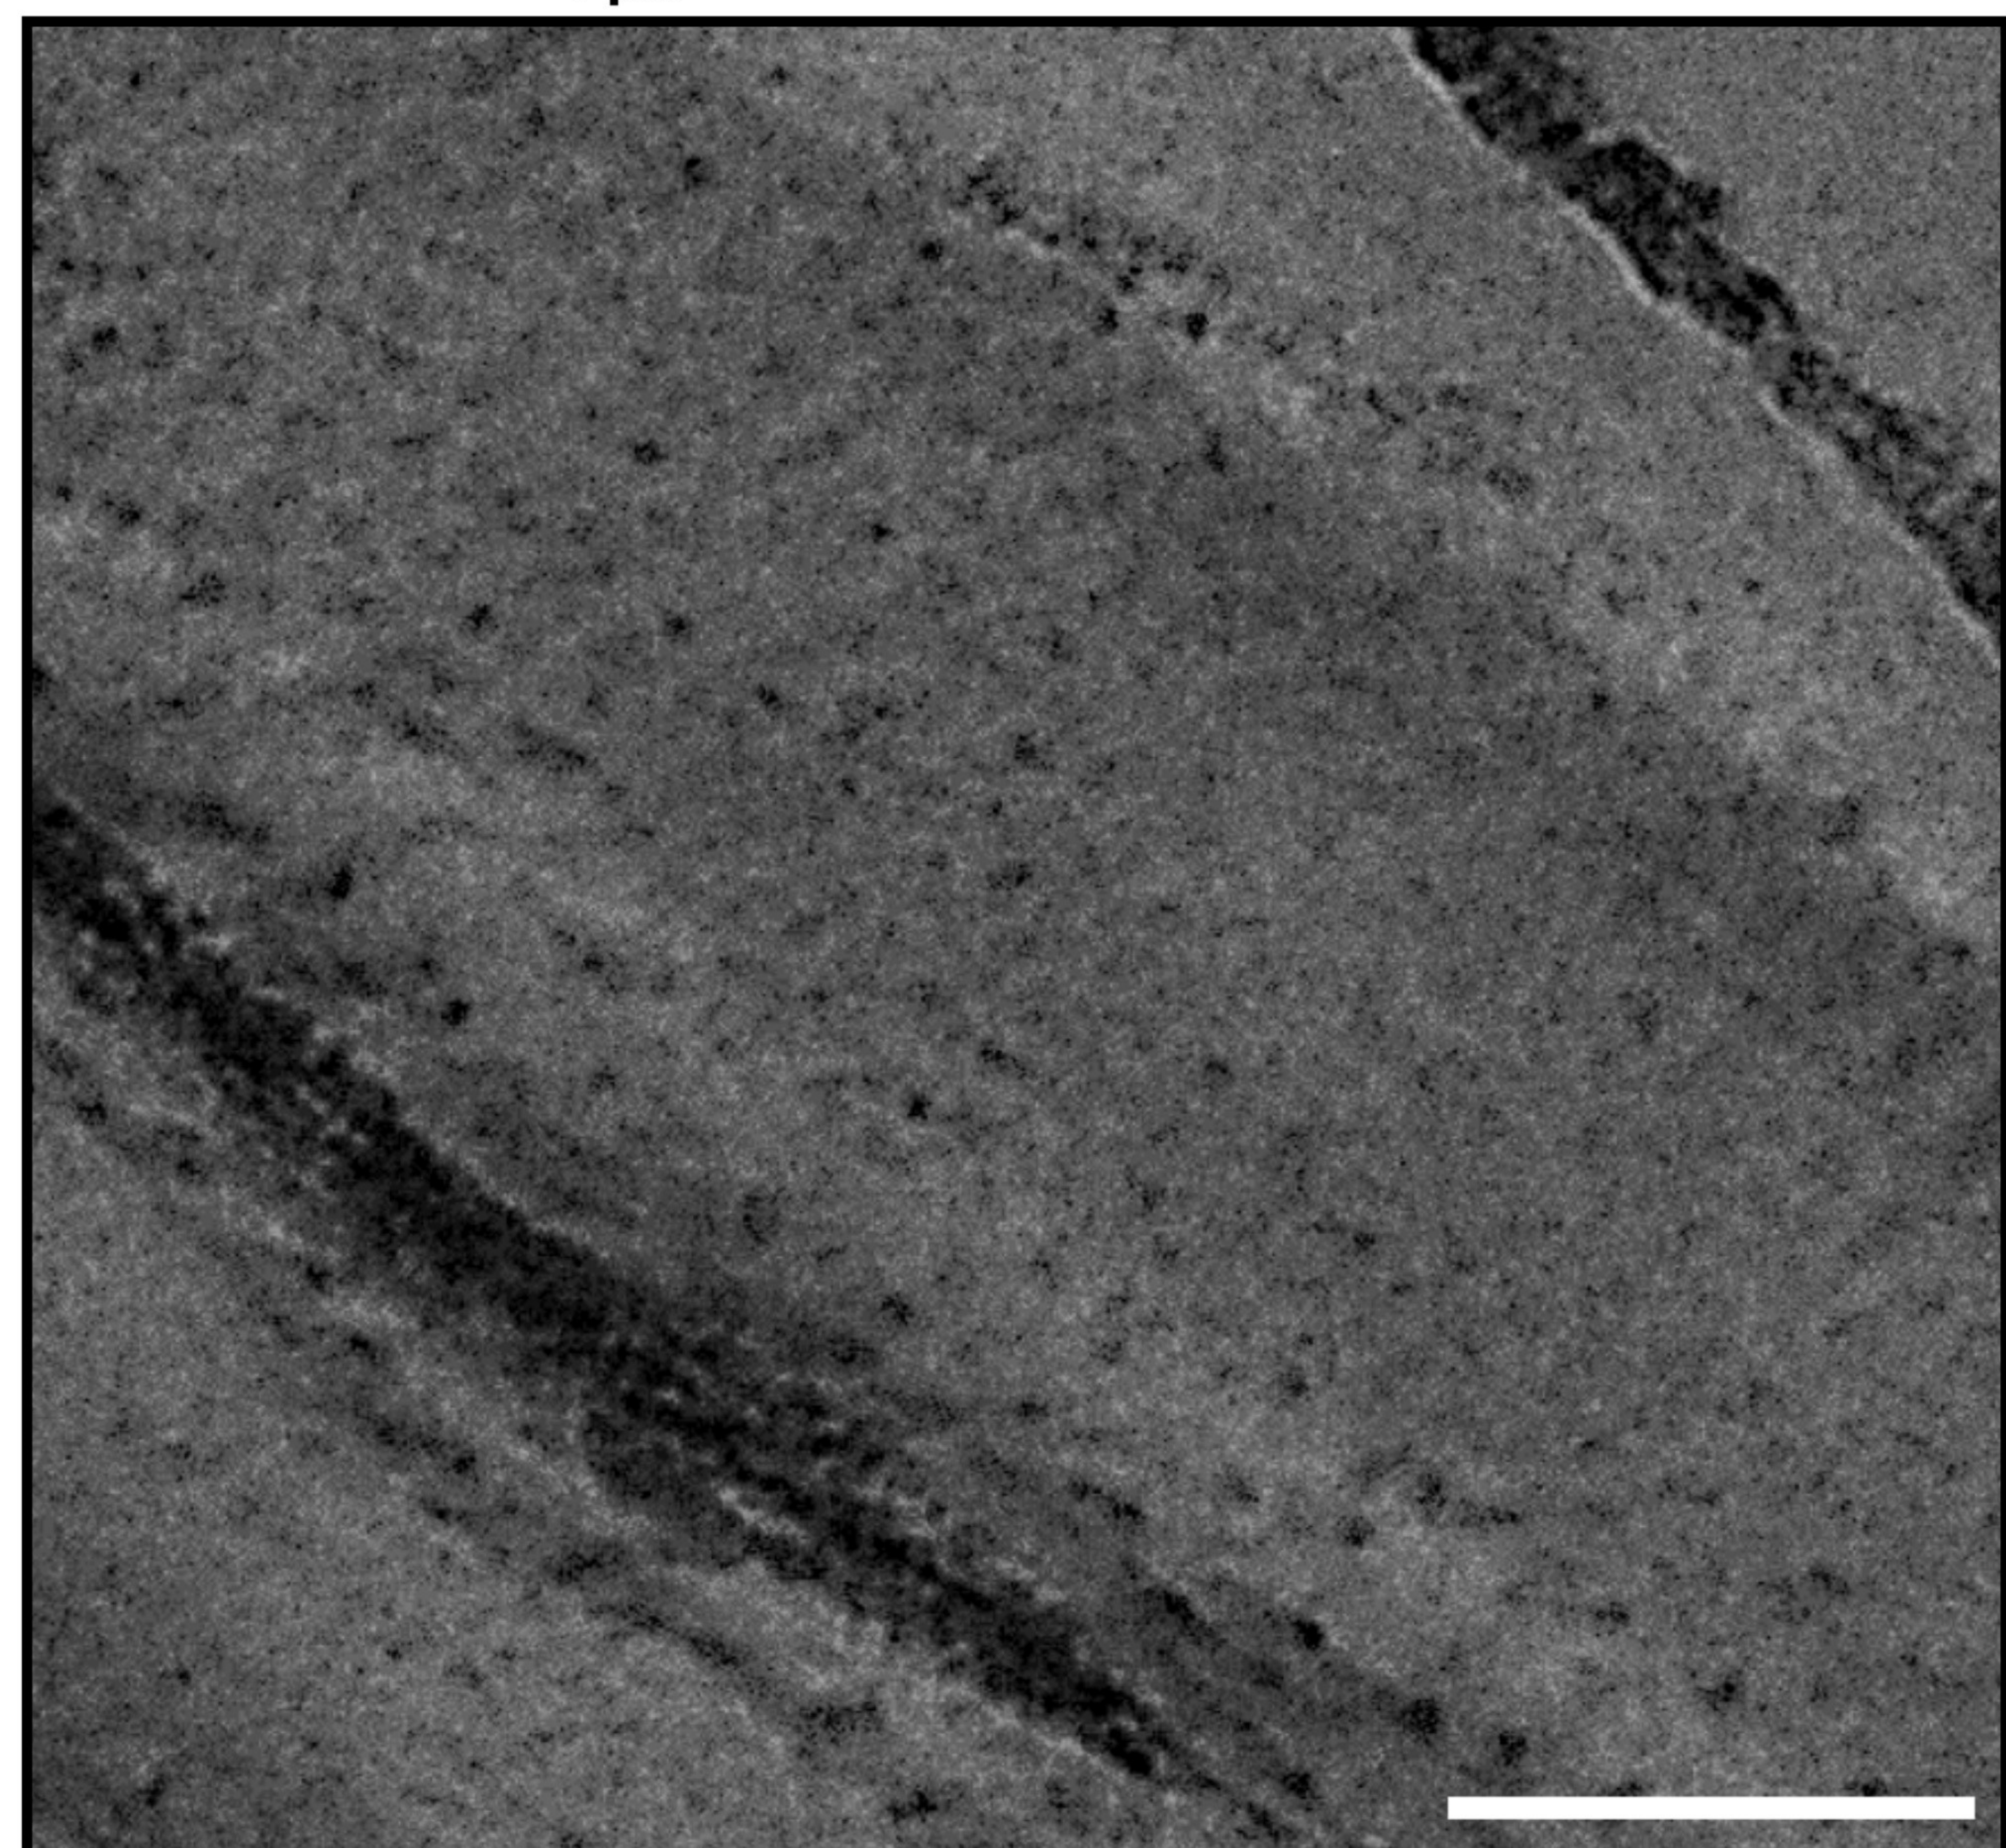

Supplement: d3su00326d5.pdf [file d3su00326d5.pdf]

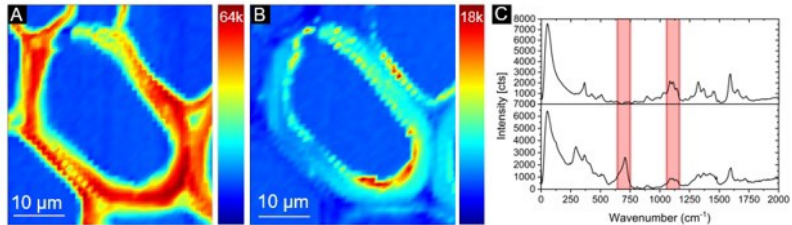

Supplement: d3su00326d6.pdf [file d3su00326d6.pdf]

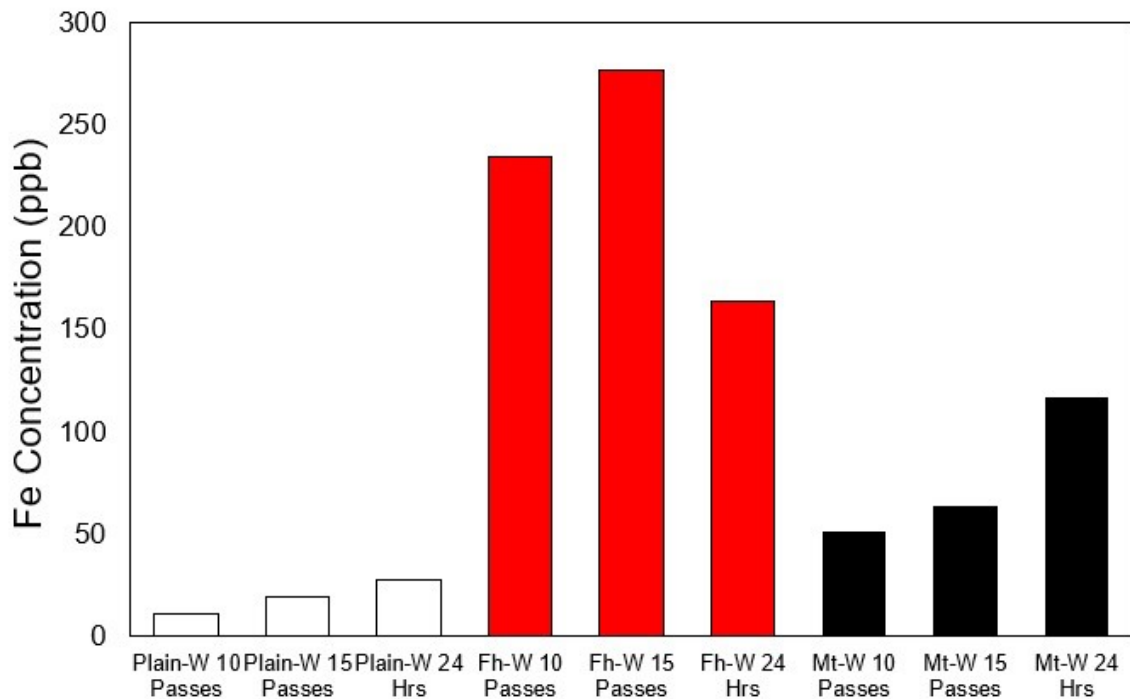

Supplement: d3su00326d7.pdf [file d3su00326d7.pdf]

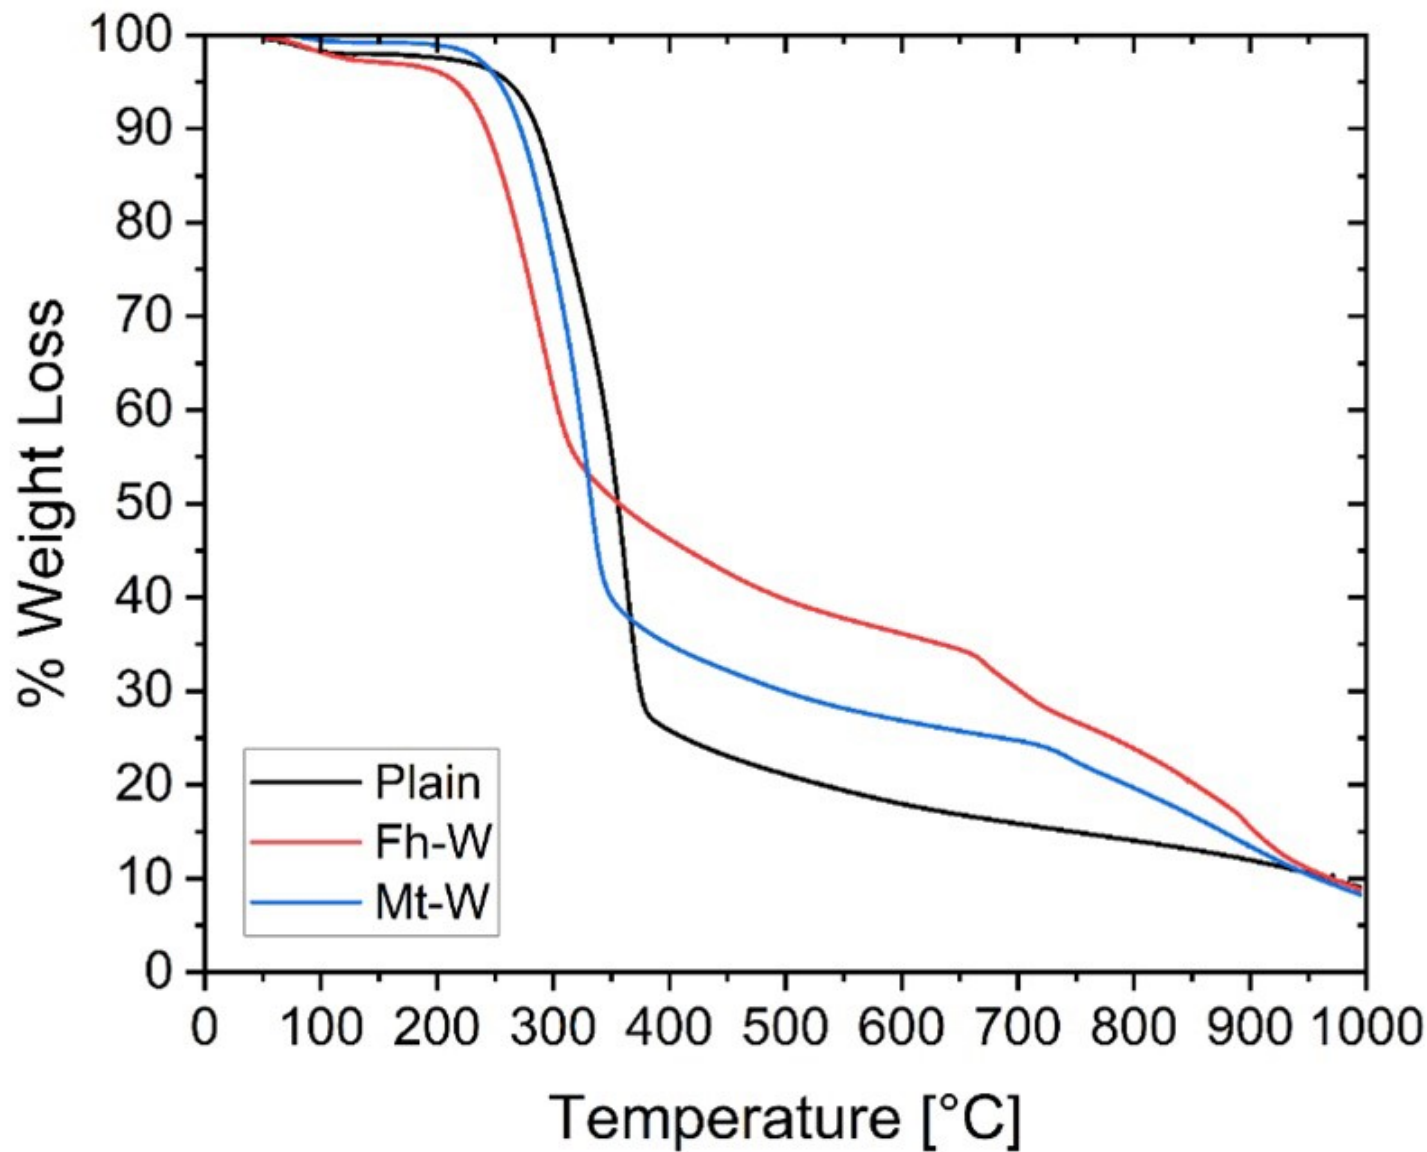

Supplement: d3su00326d8.pdf [file d3su00326d8.pdf]
